# Supplementary material for: The influence of different light spectra on physiological responses, antioxidant capacity and chemical compositions in two holy basil cultivars
Source: PubMed Central journal article supplement (PMC8755830; doi:10.1038/s41598-021-04577-x), 2022-01-12
Supplement: 41598_2021_4577_MOESM1_ESM.pdf [file 41598_2021_4577_MOESM1_ESM.pdf]

## Supplementary document S1

### The influence of different light spectra on physiological responses, antioxidant capacity and chemical compositions in two holy basil cultivars

Panita Chutimanukul<sup>1</sup>, Praderm Wanichananan<sup>1</sup>, Supattana Janta<sup>1</sup>, Theerayut Toojinda<sup>1</sup>, Clive Terence Darwell<sup>1</sup>, and Kriengkrai Mosaleeyanon<sup>1,\*</sup>

\*Corresponding author: Kriengkrai Mosaleeyanon, Tel. +6625646700

Email: krieng@biotec.or.th

#### The relative spectra of the light treatments

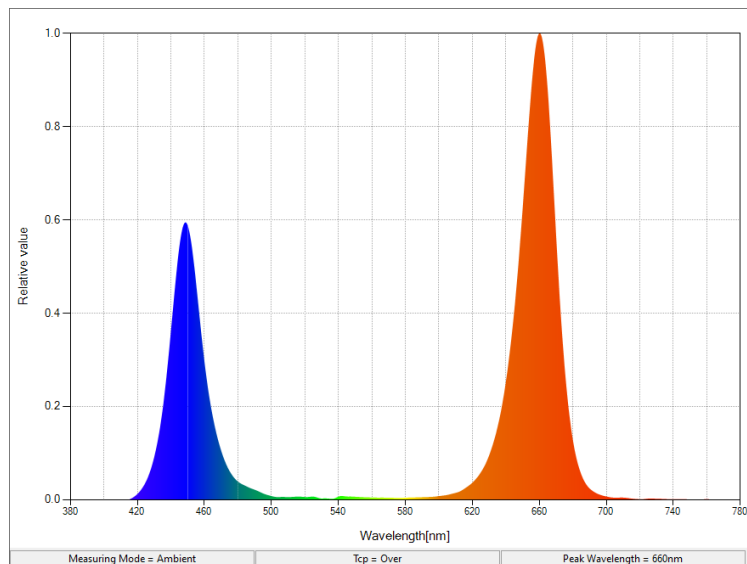

The relative spectra of the light treatment (3Red : 1Blue)

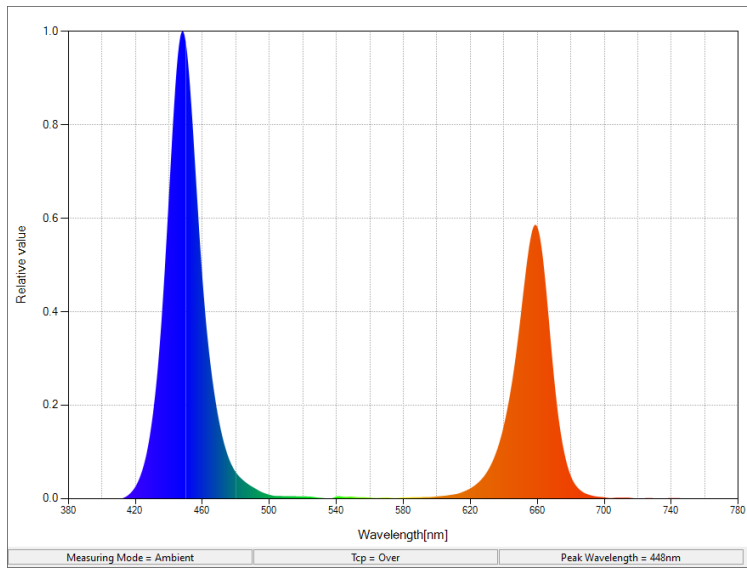

The relative spectra of the light treatment (1Red : 1Blue)

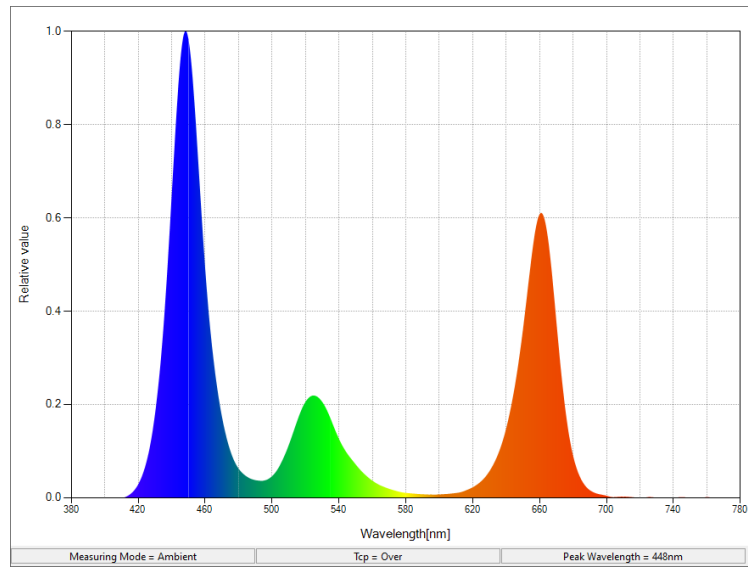

The relative spectra of the light treatment (2Red : 1Green : 2Blue)

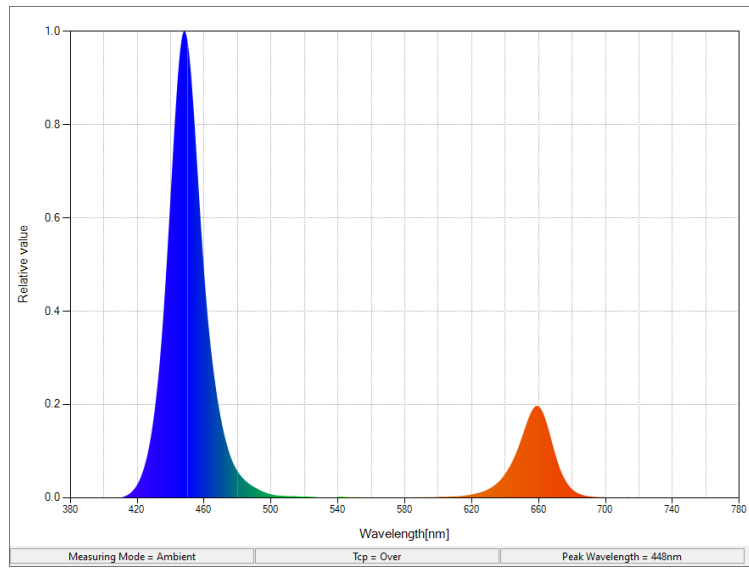

The relative spectra of the light treatment (1Red : 3Blue)

## Supplementary document S2

### The influence of different light spectra on physiological responses, antioxidant capacity and chemical compositions in two holy basil cultivars

Panita Chutimanukul<sup>1</sup>, Praderm Wanichananan<sup>1</sup>, Supattana Janta<sup>1</sup>, Theerayut Toojinda<sup>1</sup>, Clive Terence Darwell<sup>1</sup>, and Kriengkrai Mosaleeyanon<sup>1,\*</sup>

\*Corresponding author: Kriengkrai Mosaleeyanon, Tel. +6625646700

Email: krieng@biotec.or.th

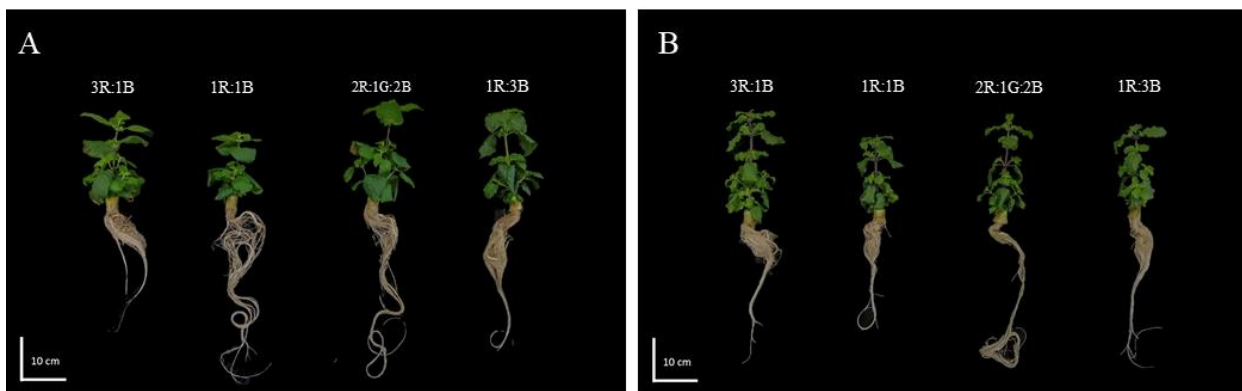

**Figure S1.** The phenotypes of green holy basil (A) and red holy basil (B) under four light treatments at vegetative stage.

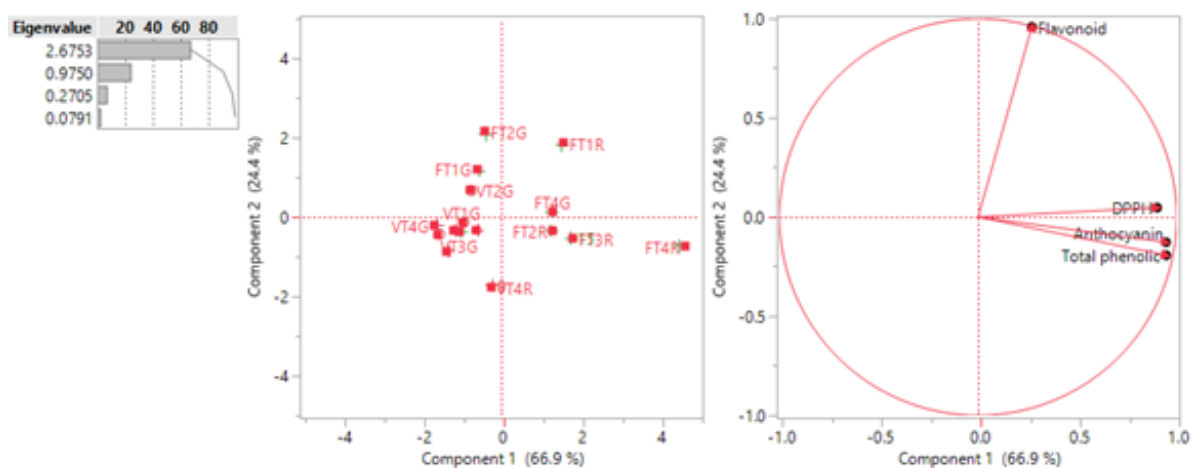

**Figure S2.** Correlation circle of the principal components analysis (PCA) on the correlation matrix built using data for total phenolic content, flavonoid content, DPPH.

## Supplementary Table S1

### The influence of different light spectra on physiological responses, antioxidant capacity and chemical compositions in two holy basil cultivars

Panita Chutimanukul<sup>1</sup>, Praderm Wanichananan<sup>1</sup>, Supattana Janta<sup>1</sup>, Theerayut Toojinda<sup>1</sup>, Clive Terence Darwell<sup>1</sup>, and Kriengkrai Mosaleeyanon<sup>1,\*</sup>

Table The details of the daily environment in the plant factory with artificial light

| Date       | InAirTemp | InAirHumid | InCO2Dens |
|------------|-----------|------------|-----------|
|            | C         | %          | ppm       |
| 24/9/2020  | 23.91     | 73.88      | 1009.25   |
| 25/9/2020  | 23.91     | 73.44      | 1010.19   |
| 26/9/2020  | 24.17     | 73.45      | 1008.39   |
| 27/9/2020  | 24.36     | 74.16      | 1018.39   |
| 28/9/2020  | 24.39     | 73.90      | 1102.28   |
| 29/9/2020  | 24.40     | 73.21      | 1093.60   |
| 30/9/2020  | 24.35     | 72.35      | 1056.24   |
| 1/10/2020  | 24.36     | 73.08      | 1025.26   |
| 2/10/2020  | 24.12     | 73.63      | 1009.24   |
| 3/10/2020  | 24.20     | 73.90      | 1032.76   |
| 4/10/2020  | 24.08     | 74.16      | 997.59    |
| 5/10/2020  | 24.30     | 73.78      | 1019.26   |
| 6/10/2020  | 24.08     | 73.80      | 973.79    |
| 7/10/2020  | 24.97     | 73.85      | 999.75    |
| 8/10/2020  | 24.21     | 73.93      | 1013.45   |
| 9/10/2020  | 24.69     | 74.13      | 960.67    |
| 10/10/2020 | 23.82     | 73.91      | 1028.79   |
| 11/10/2020 | 24.65     | 74.02      | 1015.34   |
| 12/10/2020 | 24.83     | 73.84      | 1012.75   |
| 13/10/2020 | 24.55     | 74.28      | 1015.54   |
| 14/10/2020 | 23.63     | 72.14      | 1014.03   |
| 15/10/2020 | 24.61     | 70.68      | 1015.08   |
| 16/10/2020 | 23.39     | 70.33      | 1018.92   |
| 17/10/2020 | 24.42     | 70.44      | 1018.35   |
| 18/10/2020 | 23.62     | 70.49      | 1015.63   |
| 19/10/2020 | 24.60     | 70.66      | 1021.03   |
| 20/10/2020 | 23.67     | 70.87      | 1024.11   |
| 21/10/2020 | 24.21     | 70.11      | 1023.19   |
| 22/10/2020 | 24.15     | 70.17      | 1032.00   |
| 23/10/2020 | 24.27     | 70.48      | 1026.75   |
| 24/10/2020 | 24.11     | 70.47      | 1023.39   |
| 25/10/2020 | 24.18     | 70.69      | 1020.15   |
| 26/10/2020 | 22.99     | 70.65      | 1096.58   |
| 27/10/2020 | 24.78     | 71.44      | 1082.36   |

|            |       |       |         |
|------------|-------|-------|---------|
| 28/10/2020 | 24.38 | 71.49 | 1042.61 |
| 29/10/2020 | 24.78 | 71.48 | 994.41  |
| 30/10/2020 | 24.51 | 71.40 | 1094.83 |
| 31/10/2020 | 24.59 | 71.58 | 1018.62 |
| 1/11/2020  | 24.66 | 70.71 | 982.59  |
| 2/11/2020  | 24.68 | 70.10 | 995.44  |
| 3/11/2020  | 23.58 | 70.29 | 1071.12 |
| 4/11/2020  | 24.48 | 70.80 | 993.61  |
| 5/11/2020  | 24.58 | 70.79 | 1098.98 |
| Average    | 24.26 | 72.16 | 1026.19 |

I)

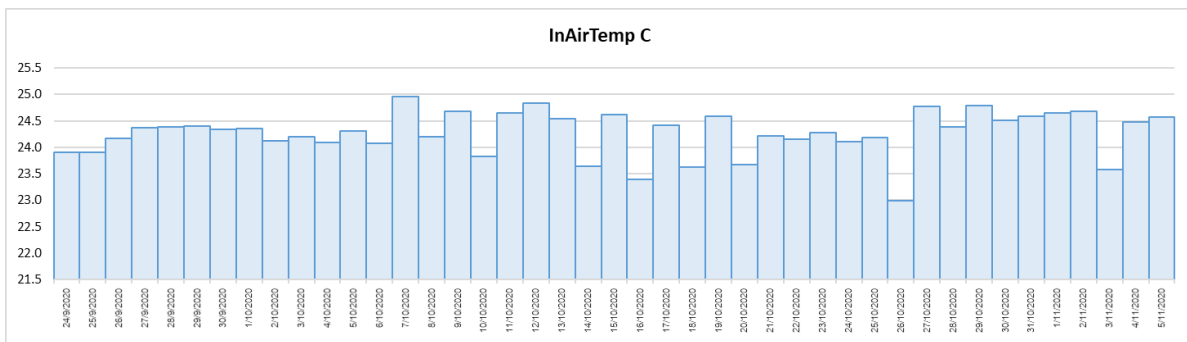

II)

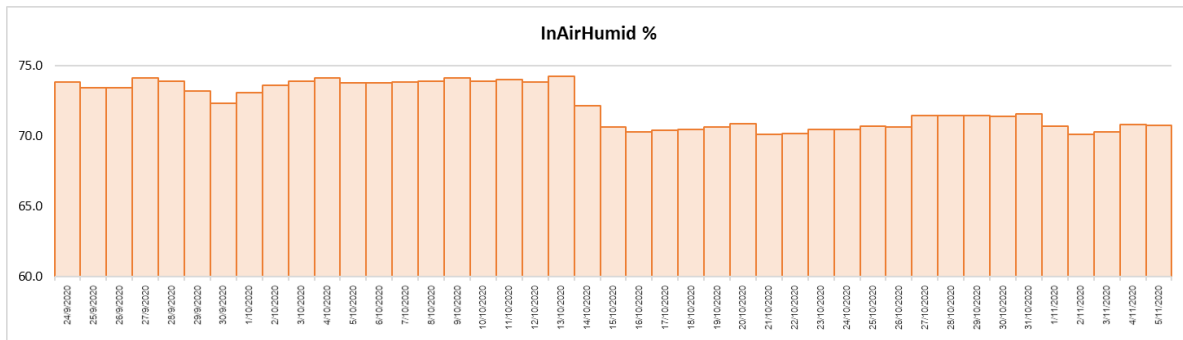

III)

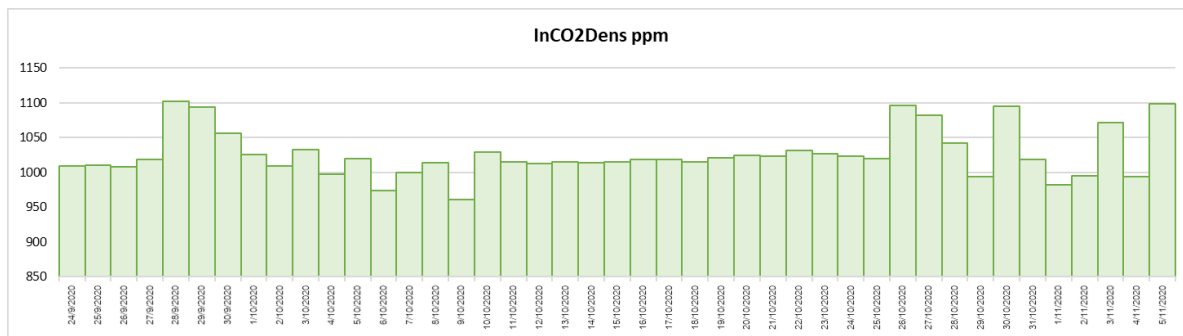

## Supplementary Table S2

### The influence of different light spectra on physiological responses, antioxidant capacity and chemical compositions in two holy basil cultivars

Panita Chutimanukul<sup>1</sup>, Praderm Wanichananan<sup>1</sup>, Supattana Janta<sup>1</sup>, Theerayut Toojinda<sup>1</sup>, Clive Terence Darwell<sup>1</sup>, and Kriengkrai Mosaleeyanon<sup>1,\*</sup>

\*Corresponding author: Kriengkrai Mosaleeyanon, Tel. +6625646700

Email: krieng@biotec.or.th

Table Correlation analysis among biomass, physiological parameters and antioxidant capacity of two holy basil cultivars and two developmental stages response to four different light spectrum ratios.

| Attributes  | Pn      | gs      | Ci      | E       | PhiPS2  | ETR     | NPQ     | NDVI    | GI      | WI      | CRII    | TPC     | Flavonoid c | DPPH    | Anthocyanin | FW      | DW      | Height  |
|-------------|---------|---------|---------|---------|---------|---------|---------|---------|---------|---------|---------|---------|-------------|---------|-------------|---------|---------|---------|
| Pn          | 1       | -0.1048 | -0.8357 | -0.6236 | 0.5048  | 0.3415  | -0.1237 | 0.4525  | 0.2113  | -0.1409 | 0.2773  | -0.3517 | 0.4898      | -0.3294 | -0.1947     | 0.1886  | 0.1852  | 0.4006  |
| gs          | -0.1048 | 1       | 0.0247  | 0.0994  | -0.7776 | -0.7901 | 0.2924  | 0.1028  | -0.6766 | 0.2553  | -0.5608 | 0.6629  | 0.3876      | 0.8569  | 0.7476      | 0.4624  | 0.5308  | 0.4725  |
| Ci          | -0.8357 | 0.0247  | 1       | 0.7843  | -0.2301 | -0.0663 | 0.1405  | -0.6326 | -0.3209 | -0.0013 | -0.3697 | 0.251   | -0.6056     | 0.139   | 0.1767      | -0.4438 | -0.4684 | -0.5668 |
| E           | -0.6236 | 0.0994  | 0.7843  | 1       | -0.114  | 0.0347  | -0.2308 | -0.2939 | -0.4404 | 0.19    | -0.3867 | 0.4274  | -0.373      | 0.1036  | 0.4466      | -0.6293 | -0.6118 | -0.6759 |
| PhiPS2      | 0.5048  | -0.7776 | -0.2301 | -0.114  | 1       | 0.9756  | -0.3183 | -0.0884 | 0.3567  | -0.412  | 0.2776  | -0.4696 | -0.1974     | -0.7844 | -0.4513     | -0.5515 | -0.5858 | -0.4116 |
| ETR         | 0.3415  | -0.7901 | -0.0663 | 0.0347  | 0.9756  | 1       | -0.375  | -0.1659 | 0.2875  | -0.4451 | 0.1853  | -0.3494 | -0.2868     | -0.7504 | -0.3829     | -0.6568 | -0.674  | -0.5412 |
| NPQ         | -0.1237 | 0.2924  | 0.1405  | -0.2308 | -0.3183 | -0.375  | 1       | -0.5972 | -0.2767 | -0.1102 | -0.3502 | -0.0829 | -0.252      | 0.2698  | 0.0491      | 0.42    | 0.3286  | 0.4369  |
| NDVI        | 0.4525  | 0.1028  | -0.6326 | -0.2939 | -0.0884 | -0.1659 | -0.5972 | 1       | 0.3844  | 0.2151  | 0.5198  | -0.0625 | 0.6736      | -0.0584 | -0.0321     | 0.3074  | 0.3459  | 0.3199  |
| GI          | 0.2113  | -0.6766 | -0.3209 | -0.4404 | 0.3567  | 0.2875  | -0.2767 | 0.3844  | 1       | -0.1504 | 0.9545  | -0.7141 | 0.0084      | -0.5758 | -0.7812     | -0.0332 | -0.1011 | -0.0822 |
| WI          | -0.1409 | 0.2553  | -0.0013 | 0.19    | -0.412  | -0.4451 | -0.1102 | 0.2151  | -0.1504 | 1       | -0.0348 | 0.029   | 0.0482      | 0.088   | 0.0599      | 0.184   | 0.1993  | 0.0728  |
| CRII        | 0.2773  | -0.5608 | -0.3697 | -0.3867 | 0.2776  | 0.1853  | -0.3502 | 0.5198  | 0.9545  | -0.0348 | 1       | -0.706  | 0.1301      | -0.5144 | -0.7205     | 0.027   | -0.0488 | -0.0092 |
| TPC         | -0.3517 | 0.6629  | 0.251   | 0.4274  | -0.4696 | -0.3494 | -0.0829 | -0.0625 | -0.7141 | 0.029   | -0.706  | 1       | 0.088       | 0.7725  | 0.9166      | -0.0884 | 0.0377  | -0.0873 |
| Flavonoid c | 0.4898  | 0.3876  | -0.6056 | -0.373  | -0.1974 | -0.2868 | -0.252  | 0.6736  | 0.0084  | 0.0482  | 0.1301  | 0.088   | 1           | 0.2531  | 0.1502      | 0.3921  | 0.5525  | 0.5054  |
| DPPH        | -0.3294 | 0.8569  | 0.139   | 0.1036  | -0.7844 | -0.7504 | 0.2698  | -0.0584 | -0.5758 | 0.088   | -0.5144 | 0.7725  | 0.2531      | 1       | 0.75        | 0.3236  | 0.4047  | 0.2876  |
| Anthocyanin | -0.1947 | 0.7476  | 0.1767  | 0.4466  | -0.4513 | -0.3829 | 0.0491  | -0.0321 | -0.7812 | 0.0599  | -0.7205 | 0.9166  | 0.1502      | 0.75    | 1           | -0.06   | 0.0182  | -0.0093 |
| FW          | 0.1886  | 0.4624  | -0.4438 | -0.6293 | -0.5515 | -0.6568 | 0.42    | 0.3074  | -0.0332 | 0.184   | 0.027   | -0.0884 | 0.3921      | 0.3236  | -0.06       | 1       | 0.9591  | 0.9508  |
| DW          | 0.1852  | 0.5308  | -0.4684 | -0.6118 | -0.5858 | -0.674  | 0.3286  | 0.3459  | -0.1011 | 0.1993  | -0.0488 | 0.0377  | 0.5525      | 0.4047  | 0.0182      | 0.9591  | 1       | 0.9342  |
| Height      | 0.4006  | 0.4725  | -0.5668 | -0.6759 | -0.4116 | -0.5412 | 0.4369  | 0.3199  | -0.0822 | 0.0728  | -0.0092 | -0.0873 | 0.5054      | 0.2876  | -0.0093     | 0.9508  | 0.9342  | 1       |
